1 **Title:** Cerebrovascular Response to an Acute Bout of Short Interval High Intensity Interval  
2 Exercise and Recovery in Healthy Adults

3  
4 Alicen A. Whitaker, DPT<sup>1</sup>, Stacey E. Aaron, PhD<sup>1</sup>, Carolyn S. Kaufman, PhD<sup>2</sup>, Brady K. Kurtz,  
5 MS<sup>1</sup>, Stephen X. Bai, MD<sup>3</sup>, Eric D. Vidoni, PT, PhD<sup>4</sup>, Sandra A. Billinger, PT, PhD<sup>1,2,3,5</sup>

6  
7 <sup>1</sup>Department of Physical Therapy and Rehabilitation Science, University of Kansas Medical  
8 Center, Kansas City, KS

9 <sup>2</sup> Department of Molecular and Integrative Physiology, University of Kansas Medical Center,  
10 Kansas City, KS

11 <sup>3</sup>Department of Physical Medicine and Rehabilitation, University of Kansas Medical Center,  
12 Kansas City, KS

13 <sup>4</sup>University of Kansas Alzheimer's Disease Center, Fairway, KS

14 <sup>5</sup>Department of Neurology, University of Kansas Medical Center, Kansas City, KS

15 **Corresponding Author:**

16 Sandra A. Billinger, PT, PhD

17 Address: 3901 Rainbow Blvd, Mail Stop 2002, Kansas City, KS 66160

18 Phone: 913-945-6685

19 Fax: 913-588-9428

20 Email: [sbillinger@kumc.edu](mailto:sbillinger@kumc.edu)

21

22 **Abstract**

23 **Introduction:** High intensity interval exercise (HIIE) is performed widely. However, the field  
24 possesses limited knowledge regarding the acute HIIE cerebrovascular response. Our objective  
25 was to characterize the middle cerebral artery blood velocity (MCAv) response during an acute  
26 bout of short interval HIIE in healthy adults. We hypothesized MCAv would decrease below BL  
27 1) during HIIE, 2) following HIIE, 3) and 30-minutes after HIIE. As a secondary objective, we  
28 investigated sex differences in the MCAv response during HIIE.

29 **Methods:** Fourteen healthy adults (7 male) completed the HIIE session. The 10-minute HIIE  
30 session included alternating 1-minute bouts of high-intensity and low-intensity intervals. MCAv,  
31 mean arterial pressure (MAP), heart rate (HR), and expired end tidal carbon dioxide ( $P_{ET}CO_2$ ),  
32 were recorded at BL, during HIIE, following HIIE, and 30-minutes after HIIE.

33 **Results:** Contrary to our hypothesis, MCAv remained above BL for the HIIE duration. MCAv  
34 peaked at the third minute then decreased concomitantly with  $P_{ET}CO_2$ . MCAv was lower than  
35 BL after HIIE ( $p=0.03$ ). Thirty minutes after HIIE, MCAv returned to near BL values ( $p = 0.47$ ).  
36 Women showed higher BL MCAv ( $\bar{x} = 70.9 \pm 8.1 \text{ cm}\cdot\text{s}^{-1}$ ) compared to men ( $\bar{x} = 59.3 \pm 5.8 \text{ cm}\cdot\text{s}^{-1}$ ,  
37  $p = 0.01$ ). A greater magnitude of MCAv response was observed in men resulting in non-  
38 significant differences during HIIE secondary to higher workload ( $p = 0.03$ ).

39 **Conclusions:** Collectively, these findings show that in healthy adults, MCAv remained above  
40 BL during a 10-minute short-interval HIIE and returned to resting values 30 minutes after  
41 exercise.

42 **Key Words:** Blood Flow, Cerebral Blood Velocity, Sprint Interval Training, Autoregulation,  
43 Reactivity, Conductance

## 44 **Introduction**

45 Temporal changes in cerebral blood flow, measured by middle cerebral artery blood velocity  
46 (MCAv), have been well characterized during submaximal continuous exercise.(1-4) During  
47 steady-state low and moderate intensity continuous exercise, MCAv remains at a consistent  
48 rate.(2, 5) As exercise intensifies, MCAv increases in tandem up to anaerobic threshold, (1, 6, 7)  
49 thereafter MCAv decreases with high intensity exercise.(1, 4, 6) At the anaerobic threshold,  
50 hyperventilation occurs, resulting in decreased partial pressure carbon dioxide (PaCO<sub>2</sub>). (8) To  
51 attenuate the decrease in PaCO<sub>2</sub>, downstream arteriole vasoconstriction occurs causing a  
52 decrease in MCAv.(9)

53  
54 While MCAv has been characterized during an acute bout of high intensity continuous  
55 exercise,(1, 3) our recent systematic review determined few studies have examined MCAv  
56 during an acute bout of high intensity interval exercise (HIIE).(10) HIIE is defined as repetitive  
57 short bouts of exercise switching between intervals of high intensity and low intensity recovery.  
58 In prepubertal children MCAv decreased below baseline (BL) during an acute 12-minute bout of  
59 HIIE with 1-minute intervals.(11) In contrast, healthy adults (average age of 23 years old)  
60 showed decreases in MCAv during an acute 20-minute bout of sprint interval exercise with  
61 repetitive 30-second sprint intervals at maximal effort with 4.5-minute active recovery. The  
62 authors report MCAv remained above BL throughout the duration of HIIE. The longer recovery  
63 interval of 4.5 minutes may have allowed for stabilization of PaCO<sub>2</sub>, therefore maintaining  
64 MCAv above baseline.(12)

65

66 Interval exercise at moderate intensity has been proposed to be beneficial for cerebrovascular  
67 function in older men due to the low intensity intervals allowing recovery of  $P_{ET}CO_2$  and  
68 sustained MCAv.(13) However, sustained MCAv during HIIE has been stated to be  
69 counterintuitive due to decreases in expired end tidal carbon dioxide ( $P_{ET}CO_2$ ).(13) Further, short  
70 interval HIIE with 1-minute low intensity intervals may not be enough time to allow for recovery  
71 of  $P_{ET}CO_2$ , leading to reductions of MCAv. Although this has been suggested, no studies have  
72 reported the effects of short interval HIIE on MCAv. To address this gap in knowledge, we  
73 proposed to characterize the MCAv response in healthy adults during a single bout of HIIE using  
74 1-minute intervals of high and low intensity.

75

76 Our primary hypothesis was that MCAv would significantly decrease below BL MCAv during  
77 an acute 10-minute HIIE bout. Our secondary hypotheses were that MCAv would be  
78 significantly lower than BL MCAv 1) during passive recovery after HIIE and 2) at rest 30-  
79 minutes after HIIE. Further, we hypothesize that the decrease in MCAv will be related to the  
80 change in  $P_{ET}CO_2$ . Our previous work identified unique sex-specific trajectories in resting  
81 MCAv over the lifespan(14) and to moderate-intensity continuous exercise.(15) Therefore, as a  
82 secondary objective, we investigated whether sex differences existed in the MCAv response to  
83 HIIE.

84

## 85 **Methods**

86 Individuals were recruited from the surrounding community using flyers. Participants were  
87 enrolled in the study if they met the following inclusion criteria: 1) 18-30 years old and 2) low  
88 cardiac risk defined by the American College of Sports Medicine (ACSM).(16) The study and all

89 experimental procedures were approved by the University of Kansas Medical Center Human  
90 Subjects Committee. This study is registered on clinical trials.gov (NCT04673994). Prior to the  
91 start of study procedures, participants provided written informed consent.

92  
93 Fifteen healthy adults (7 women, 8 men) completed the study consisting of two visits to the  
94 laboratory. The second visit occurred 48 hours to 2 weeks after the initial visit. No adverse  
95 events occurred. Due to loss of TCD signal during HIIE, we excluded one male individual from  
96 data analysis. Three participants required rescheduling for study visit 2 due to University closure  
97 for weather. These individuals completed study visit 2 within one month of the initial study visit.  
98 All participants confirmed they refrained from caffeine for 8 hours,(17) vigorous exercise for 24  
99 hours,(18) and alcohol for 24 hours.(19) All participants reported no change in health or physical  
100 activity levels between study visits. For women, visits were scheduled between days 1-7 of the  
101 menstrual cycle.(20) Study visits were scheduled between 2-5pm to maintain consistency and  
102 minimize circadian influence on cerebral blood velocity.(21) All participants were classified as  
103 having <50% carotid stenosis.(22) Six out of seven (86%)women reported using birth control  
104 medication. Participant characteristics are presented in **Table 1**.

105

106 **Table 1. Participant Characteristics**

|                               | <b>All</b>    | <b>Women</b> | <b>Men</b>   | <b>p-value</b> |
|-------------------------------|---------------|--------------|--------------|----------------|
|                               | <b>(n=14)</b> | <b>(n=7)</b> | <b>(n=7)</b> |                |
| <b>Age (years)</b>            | 24 ± 1        | 24 ± 1       | 25 ± 1       | 0.65           |
| <b>BMI (kg/m<sup>2</sup>)</b> | 23.04 ± 4.03  | 20.14 ± 3.16 | 25.94 ± 2.35 | <b>0.002</b>   |
| <b>Race/Ethnicity n (%)</b>   |               |              |              |                |

|                                                                               |              |              |              |             |
|-------------------------------------------------------------------------------|--------------|--------------|--------------|-------------|
| White/Caucasian                                                               | 11 (79%)     | 6 (86%)      | 5 (71%)      | 1.00        |
| Hispanic/Latino                                                               | 1 (7%)       | 0            | 1 (14%)      | 1.00        |
| Asian                                                                         | 2 (14%)      | 1 (14%)      | 1 (14%)      | 1.00        |
| <b>Physical Activity Score n (%)</b>                                          |              |              |              |             |
| <10 minutes, 5x/week                                                          | 1 (7%)       | 1 (14%)      | 0            |             |
| 20-60 minutes per week                                                        | 1 (7%)       | 0            | 1 (14%)      |             |
| 1-3 hours per week                                                            | 1(7%)        | 0            | 1 (14%)      |             |
| >3 hours per week                                                             | 11 (79%)     | 6 (86%)      | 5 (71%)      | 1.00        |
| <b>TBRS estimated <math>\dot{V}O_{2max}</math></b>                            | 44.39 ± 7.15 | 42.27 ± 4.75 | 46.51 ± 8.81 | 0.46        |
| <b>(ml·kg<sup>-1</sup>·min<sup>-1</sup>)</b>                                  |              |              |              |             |
| <b>Regularly Performs HIIE n (%)</b>                                          | 8 (57%)      | 5 (71%)      | 3 (43%)      | 0.59        |
| <b>Absolute High Intensity Resistance (Watts)</b>                             | 129 ± 39     | 107 ± 17     | 151 ± 44     | <b>0.03</b> |
| <b>Relative High Intensity Resistance (estimated <math>Watt_{max}</math>)</b> | 70 % ± 5%    | 71% ± 7%     | 69% ± 3%     | 0.67        |
| <b>Absolute Recovery Resistance (Watts)</b>                                   | 19 ± 5       | 16 ± 2       | 22 ± 6       | <b>0.02</b> |
| <b>Relative Recovery Resistance (estimated <math>Watt_{max}</math>)</b>       | 11% ± 1%     | 11% ± 2%     | 10% ± 0.1%   | 0.81        |
| <b>Average Steps Per Minute</b>                                               | 98 ± 2       | 98 ± 2       | 99 ± 2       | 0.48        |

Means ± Standard Deviations. BMI = Body Mass Index. TBRS = Total Body Recumbent

Stepper Submaximal Exercise Test.  $VO_{2max}$  = maximal oxygen consumption. HIIE = High

---

Intensity Interval Exercise.

---

107

108 *Study Visit 1*

109 We collected demographic information including age, sex, race/ethnicity, body mass index  
110 (BMI), self-reported physical activity, current medications, and medical history. Participants  
111 completed questionnaires including the ACSM Risk Stratification Screen.(23)

112

113 TCD Signal Acquisition

114 Following the questionnaires, participants were screened to ensure a MCAv signal on the right  
115 and/or left temporal window. Participants were fitted with an adjustable headband that secured  
116 bilateral transcranial Doppler ultrasound (TCD) probes (2-MHz, Multigon Industries Inc,  
117 Yonkers, New York) with ultrasonic gel onto the temporal region of the participant's head.  
118 MCAv signal was acquired using standard probe positioning, orientation, depth, and  
119 direction.(24) The TCD depth, gain, power, and probe position were recorded to maintain  
120 consistency between study visits.

121

122 Submaximal Exercise Test

123 Participants performed the total body recumbent stepper (TBRS) submaximal exercise test(25,  
124 26) to determine the estimated maximal workload.(13, 25, 26) Participants were fitted with a  
125 heart rate monitor (Polar Electro Inc, New York) and seated on a recumbent stepper (T5XR  
126 NuStep, Inc. Ann Arbor, MI). We performed the TBRS submaximal exercise test according to  
127 previously published methodology,(25) with the exception that participants were instructed to  
128 perform exercise by only using their lower extremities. For the HIIE acute exercise bout,

129 participants would be exercising with their lower extremities since participants rested their arms  
130 on platforms to allow for accurate blood pressure measures. Therefore, we wanted to ensure an  
131 accurate workload for exercise prescription. All participants began exercising at 30 watts and  
132 stepped at a constant pace between 95-100 steps per minute. Every minute, heart rate (HR) and  
133 the rating of perceived exertion (RPE) were measured until termination criteria were met: 1)  
134 completion of all stages of the exercise test, or 2) participant requested to stop the test, or 3)  
135 participant reached 85% of their age-predicted maximal HR. The TBRS submaximal exercise  
136 linear regression equation was then used to calculate the estimated maximal oxygen consumption  
137 (estimated  $\dot{V}O_{2max}$ ).<sup>(25)</sup> The linear relationship between workload and HR (i.e. slope) was  
138 plotted and used to determine the estimated maximal watts (estimated  $Watt_{max}$ ).<sup>(27)</sup>

139

#### 140 Exercise Familiarization

141 After the TBRS submaximal exercise test, participants rested to allow HR and blood pressure to  
142 return to resting values. Individuals participated in the HIIE familiarization, switching between  
143 1-minute high intensity and 1-minute low intensity intervals while maintaining a consistent step  
144 rate on the recumbent stepper. Based on previous protocols, intensity for the acute HIIE bout was  
145 calculated as 60-80% estimated  $Watt_{max}$  for high intensity intervals and 10% estimated  $Watt_{max}$  for  
146 low intensity intervals.<sup>(28-31)</sup> HR and RPE were measured at the end of each interval. Based on  
147 previous recumbent stepper HIIE protocols, a HR limit of 85% of age predicted maximum HR  
148 was used.<sup>(32)</sup> Participants also practiced breathing through their nose during the interval  
149 exercise. The familiarization session lasted approximately 10 minutes.

150

#### 151 *Study Visit 2*



152 Carotid Ultrasound

153 Upon arrival to the laboratory, participants underwent a carotid ultrasound scan. Participants  
154 rested quietly in a supine position for 20 minutes. We then conducted a bilateral Doppler  
155 ultrasound scan of the common, internal, and external carotid artery. Carotid 2D (GE Healthcare  
156 LOGIQ Ultrasound, Chicago, IL) images as well as systolic and diastolic velocity measures were  
157 sent to a collaborating physician (SXB) for carotid stenosis assessment.(22)

158

159 MCAv Recordings

160 After completing the carotid ultrasound scan, participants were seated on the recumbent stepper  
161 and rested quietly for 20 minutes while the following equipment was donned: 1) TCD headset  
162 and bilateral ultrasound probes to measure MCAv, 2) a 5-lead electrocardiogram (ECG;  
163 Cardiocard, Nasiff Associates, Central Square, New York) for HR, 3) a nasal cannula attached to  
164 a capnograph (BCI Capnocheck Sleep 9004 Smiths Medical, Dublin, Ohio) for expired end tidal  
165 carbon dioxide ( $P_{ET}CO_2$ ) and respiratory rate (RR), 4) a beat-to-beat blood pressure cuff on the  
166 left middle finger (Finometer, Finapres Medical Systems, Amsterdam, the Netherlands) for mean  
167 arterial pressure (MAP), and 5) a brachial automated sphygmomanometer with a microphone on  
168 the right arm (Tango M2; Suntech, Morrisville, NC) to ensure an accurate calibration of the  
169 Finometer. The participant's arms were placed on stable platforms at heart level. As in our  
170 previous work, the laboratory room was dimly lit and kept at a constant temperature of 22°C to  
171 24°C.(5)

172

173 **Figure 1** details the experimental protocol. Following the BL rest recording, MCAv was  
174 continuously recorded during the 10-minute acute HIIE bout. The HIIE bout consisted of

175 repetitive 1-minute high intensity intervals (60-80% estimated  $Watt_{max}$ ) separated by 1-minute  
176 low intensity intervals (10% estimated  $Watt_{max}$ ). (13, 29) The HIIE MCAv recording started with  
177 a 1-minute low intensity interval to prevent a Valsalva Maneuver, which can occur at the start of  
178 heavy resistance exercise, eliciting a large transient drop in MAP and MCAv. (33) After 10  
179 minutes of HIIE, resistance was decreased to 15 watts and participants performed a 2-minute  
180 active cool-down. Immediately following the cool-down, participants stopped exercise and sat  
181 quietly on the recumbent stepper while we collected a 5-minute recording. The final recording  
182 lasted 5 minutes and was conducted 30 minutes after HIIE in a seated position.

183

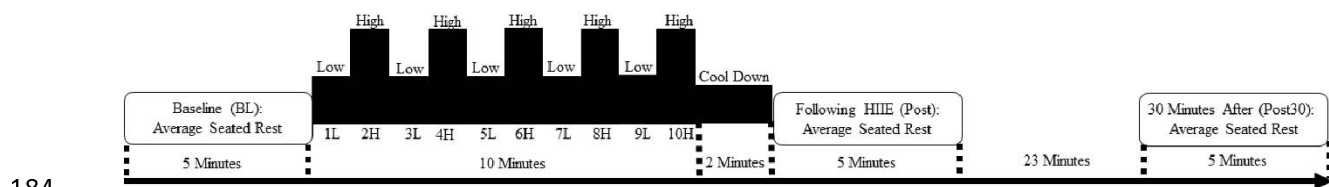

184

185 **Figure 1.** – Protocol Layout of MCAv recordings 1) before HIIE, 2) during HIIE, 3) following  
186 HIIE, and 4) 30 minutes after HIIE. L = Low intensity interval. H = High intensity interval.

187

188 Raw data were acquired through an analog-to-digital unit (NI-USB-6212, National Instruments)  
189 and custom-written software within MATLAB (v2014a, TheMathworks Inc, Natick,  
190 Massachusetts). Sampling rate was set at 500 Hz. Raw data were then time aligned and  
191 interpolated beat-to-beat using the R spike on EKG as a trigger. Each 5-minute rest recording  
192 was averaged separately at: 1) BL, 2) following HIIE, and 3) 30 minutes after HIIE. Each 1-  
193 minute interval during the 10-minute HIIE bout was averaged separately.

194

195 Data Analysis

196 Alpha was set a priori at 0.05. Normality was determined using a Shapiro-Wilk test. Consistent  
197 with previously published work, the left MCAv signal was used within the analysis to compare  
198 time points but if the left MCA signal was not obtainable, then right MCAv was used.(2, 15) To  
199 examine the conductance of peripheral blood pressure to the brain via MCAv we calculated the  
200 beat-to-beat cerebrovascular conductance index ( $CVC_i = MCAv/MAP$ )(34). Participant  
201 characteristics were analyzed using a one-way ANOVA, Mann-Whitney U test for non-  
202 parametric variables, and Fisher's exact test for categorical variables. Differences in the response  
203 to HIIE compared to BL were analyzed using a repeated measures ANOVA and post-hoc paired  
204 t-test with Bonferroni correction ( $\alpha < 0.005$ ). Relationships between the change in MCAv, MAP,  
205 and  $P_{ET}CO_2$  were analyzed using a Spearman's rank correlation coefficients. We used a repeated  
206 measures ANOVA with post-hoc paired t-test to detect differences following HIIE and 30-  
207 minutes after HIIE compared to BL. Differences in the MCAv response between sex were  
208 analyzed using a mixed design ANOVA and post-hoc independent t-test with Bonferroni  
209 correction.

210

## 211 **Results**

### 212 MCAv Response to HIIE

213 The average MCAv for each interval of HIIE is presented in **Table 2**. Odd integer intervals  
214 represent low intensity exercise while even integer intervals represent high intensity exercise,  
215 shown in **Figure 1**. Compared to BL, MCAv was significantly higher during intervals 2 through  
216 10 of HIIE ( $p < 0.001$ ). MCAv peaked at interval 3 and began to decrease throughout the  
217 remainder of the acute exercise bout, shown in **Table 2**. Following the high intensity intervals,  
218 we observed a “rebounding” response whereby MCAv increased during low intensity intervals,

219 shown in **Figure 2**. Compared to BL, MCAv was also lower after HIIE ( $p = 0.03$ ) but returned to  
 220 BL values at 30-minutes after HIIE ( $p = 0.47$ ), shown in **Table 3**.

221

222 **Table 2. MCAv Response to HIIE**

|                                     | BL     | 1 (L)  | 2 (H)  | 3 (L)  | 4 (H)   | 5 (L)  | 6 (H)   | 7 (L)  | 8 (H)  | 9 (L)  | 10 (H) |
|-------------------------------------|--------|--------|--------|--------|---------|--------|---------|--------|--------|--------|--------|
| <b>MCAv</b>                         | 65.1 ± | 68.6 ± | 76.1 ± | 84.6 ± | 81.2 ±  | 83.4 ± | 78.7 ±  | 81.5 ± | 76.6 ± | 79.5 ± | 75.0 ± |
| <b>(cm·s<sup>-1</sup>)</b>          | 9.1    | 11.5   | 11.1*  | 12.6*  | 10.8*   | 11.5*  | 10.4*   | 11.4*  | 10.4*  | 11.3*  | 9.8*   |
| <b>P<sub>ET</sub>CO<sub>2</sub></b> | 37.3 ± | 37.9 ± | 39.3 ± | 43.4 ± | 40.7 ±  | 43.0 ± | 39.8 ±  | 42.3 ± | 39.0 ± | 41.6 ± | 38.7 ± |
| <b>(mmHg)</b>                       | 2.7    | 3.5    | 4.4    | 6.0*   | 5.6     | 6.4*   | 6.2     | 6.5*   | 6.0    | 7.1    | 6.2    |
| <b>RR</b>                           | 14.0 ± | 21.2 ± | 23.3 ± | 20.2 ± | 23.9 ±  | 20.8 ± | 24.5 ±  | 21.5 ± | 24.9 ± | 22.5 ± | 25.5 ± |
| <b>(br·min<sup>-1</sup>)</b>        | 3.2    | 3.0*   | 3.5*   | 4.9*   | 4.6*    | 4.4*   | 4.6*    | 4.4*   | 4.7*   | 4.5*   | 4.7*   |
| <b>MAP</b>                          | 76.7 ± | 82.7 ± | 92.4 ± | 93.0 ± | 101.1 ± | 95.2 ± | 100.9 ± | 95.2 ± | 99.0 ± | 94.8 ± | 98.0 ± |
| <b>(mmHg)</b>                       | 11.3   | 10.2*  | 12.6*  | 12.6*  | 13.4*   | 12.7*  | 13.5*   | 13.1*  | 13.3*  | 11.6*  | 12.5*  |
| <b>CVCi</b>                         | 0.87 ± | 0.84 ± | 0.84 ± | 0.92 ± | 0.81 ±  | 0.89 ± | 0.79 ±  | 0.87 ± | 0.79 ± | 0.85 ± | 0.78 ± |
|                                     | 0.2    | 0.1    | 0.1    | 0.1    | 0.1     | 0.1    | 0.1     | 0.1    | 0.1    | 0.1    | 0.1    |
| <b>PeakHR</b>                       | -      | 47% ±  | 65% ±  | 54% ±  | 69% ±   | 57% ±  | 72% ±   | 60%    | 74% ±  | 62% ±  | 75% ±  |
| <b>(%max)</b>                       |        | 8%     | 6%     | 8%     | 7%      | 9%     | 7%      | ± 9%   | 7%     | 9%     | 7%     |

Mean ± standard deviations. Due to repeated measures with multiple comparisons,  $\alpha$  was set at 0.005.

\* = Significantly different than Baseline. MCAv = Middle Cerebral Artery Blood Velocity. P<sub>ET</sub>CO<sub>2</sub> = End Tidal Carbon Dioxide. RR = Respiratory Rate. br·min<sup>-1</sup> = breaths per minute. MAP = Mean Arterial Pressure. CVCi = Cerebrovascular Conductance Index. PeakHR = Peak Heart Rate. %max = Percent Age Predicted Maximum Heart Rate.

223

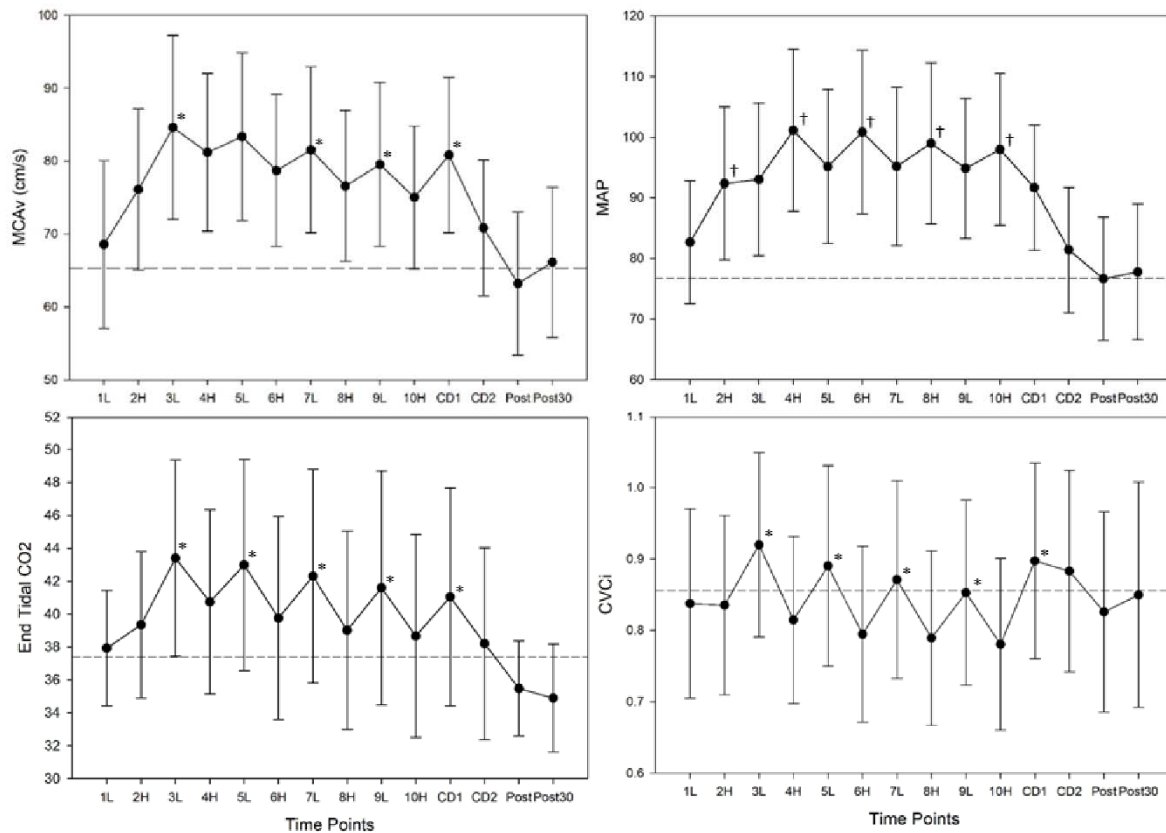

224

225 **Figure 2** - Response to high intensity interval exercise (HIIE, n = 14); Middle Cerebral Artery  
 226 blood velocity (MCAv,  $\text{cm}\cdot\text{s}^{-1}$ ), Mean Arterial Pressure (MAP, mm Hg), expired end tidal carbon  
 227 dioxide ( $P_{\text{ETCO}_2}$ , mm Hg), and cerebrovascular conductance index (CVCi,  $\text{MCAv}/\text{MAP}$ ). L =  
 228 Low intensity interval. H = High intensity interval. Horizontal dashed line represents baseline  
 229 value. \*Indicates significant “rebounding” effect during low intensity compared to previous high  
 230 intensity interval. † Indicates significant increase compared to previous low intensity interval.

231

232 MAP, HR,  $P_{\text{ETCO}_2}$  and CVCi Response to HIIE

233 During HIIE, MAP increased significantly from BL values ( $p \leq 0.002$ ), shown in **Table 2**. MAP  
 234 also significantly increased during the high intensity intervals compared to low intensity intervals  
 235 ( $p \leq 0.005$ ), shown in **Figure 2**. The change in MAP was significantly related to the change in

236 MCAv between intervals 2 and 3 ( $r = 0.82$ ,  $p < 0.001$ ), intervals 3 and 4 ( $r = 0.62$ ,  $p = 0.02$ ), and  
237 intervals 8 and 9 ( $r = 0.54$ ,  $p = 0.045$ ). MAP returned to resting values and was not significantly  
238 different from BL, following HIIE ( $p = 0.97$ ) or 30-minutes after HIIE ( $p = 0.75$ ), shown in  
239 **Table 3**.

240

241 **Table 3. MCAv Recovery Response to HIIE**

|                                            | <b>BL</b>   | <b>Post</b> | <b>Post 30</b> |
|--------------------------------------------|-------------|-------------|----------------|
| <b>MCAv (cm·s<sup>-1</sup>)</b>            | 65.1 ± 9.1  | 63.2 ± 9.8* | 66.1 ± 10.3    |
| <b>P<sub>ET</sub>CO<sub>2</sub> (mmHg)</b> | 37.3 ± 2.7  | 35.5 ± 2.9* | 34.9 ± 3.3*    |
| <b>RR (br·min<sup>-1</sup>)</b>            | 14.0 ± 3.2  | 16.1 ± 3.5* | 14.9 ± 3.1     |
| <b>MAP (mmHg)</b>                          | 76.7 ± 11.3 | 76.6 ± 10.2 | 77.7 ± 11.2    |
| <b>CVCi</b>                                | 0.87 ± 0.2  | 0.84 ± 0.1  | 0.86 ± 0.2     |
| <b>HR (bpm)</b>                            | 72 ± 11     | 96 ± 17*    | 83 ± 12*       |

Mean ± Standard Deviations. A priori  $\alpha = 0.05$ . \* = Significantly different than

Baseline. MCAv = Middle Cerebral Artery Blood Velocity. P<sub>ET</sub>CO<sub>2</sub> = End Tidal

Carbon Dioxide. RR = Respiratory Rate. br·min<sup>-1</sup> = breaths per minute. MAP = Mean

Arterial Pressure. CVCi = Cerebrovascular Conductance Index. HR = Heart Rate

242

243 Compared to BL, P<sub>ET</sub>CO<sub>2</sub> increased significantly during low intensity intervals 3, 5 and 7 ( $p$   
244  $< 0.003$ ), shown in **Table 2**. Compared to BL, RR increased during HIIE and was increased  
245 during high intensity compared to low intensity intervals ( $p \leq 0.003$ ). Compared to interval 3 (the  
246 peak MCAv interval), RR increased during high intensity intervals ( $p < 0.001$ ), which is  
247 consistent with the pattern of hyperventilation induced decreases in MCAv shown in **Figure 2**.

248 Due to increased RR (hyperventilation) during the high intensity intervals,  $P_{ET}CO_2$  was not  
249 significantly different from BL during high intensity. The change in  $P_{ET}CO_2$  was significantly  
250 related to the change in MCAv between intervals 1 and 2 ( $r = 0.60$ ,  $p = 0.03$ ), intervals 6 and 7 ( $r$   
251  $= 0.69$ ,  $p = 0.01$ ), intervals 7 and 8 ( $r = 0.81$ ,  $p < 0.001$ ), intervals 8 and 9 ( $r = 0.53$ ,  $p = 0.049$ ),  
252 and intervals 9 and 10 ( $r = 0.65$ ,  $p = 0.01$ ). During recovery,  $P_{ET}CO_2$  was significantly lower than  
253 BL following HIIE ( $p = 0.002$ ) and 30-minutes after HIIE ( $p = 0.02$ ). RR was lower than BL  
254 following HIIE ( $p = 0.02$ ) but returned to BL levels at 30-minutes after HIIE ( $p = 0.16$ ).

255

256 CVCi did not significantly change from BL during the acute HIIE bout, following HIIE or 30-  
257 minutes after HIIE. Following interval 3 (the peak MCAv interval), CVCi decreased during high  
258 intensity intervals and increased with low intensity intervals ( $p < 0.001$ ), shown in **Figure 3**. The  
259 slope from interval onset to peak CVCi was calculated during interval 1, 2, 3, 5, 7, and 9. With  
260 CVCi decreasing during intervals 4, 6, 8, and 10, the slope from interval onset to nadir CVCi  
261 value was calculated. The slopes of the CVCi response were different between high and low  
262 intensity intervals following interval 3 ( $p < 0.001$ ). The first high intensity interval, or interval 2,  
263 was faster to peak CVCi ( $18 \pm 15$  seconds) compared to the other high intensity intervals ( $p \leq$   
264  $0.001$ ). The time to peak or nadir CVCi was also significantly faster during low intensity  
265 intervals compared to high intensity intervals such as: interval 5 and 6 ( $\bar{x} = 37 \pm 9$  seconds  
266 versus  $\bar{x} = 45 \pm 4$  seconds,  $p = 0.02$ ), and interval 7 and 8 ( $\bar{x} = 33 \pm 15$  seconds versus  $\bar{x} = 48 \pm 6$   
267 seconds,  $p = 0.02$ ).

268

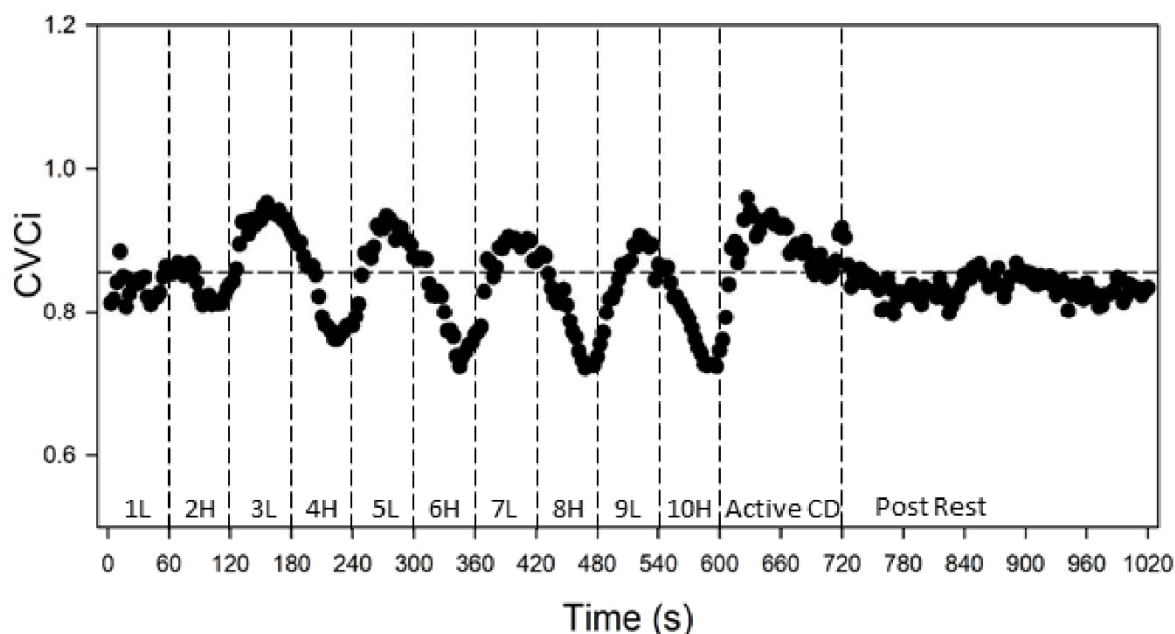

269  
270 **Figure 3** – Cerebrovascular conductance index (CVCi, MCAv/MAP) with each heartbeat. L =  
271 Low intensity interval H = High intensity interval. CD = Cool Down. Horizontal dashed line  
272 represents baseline value. High intensity interval exercise (HIIE) occurred during 0 – 600  
273 seconds (10 minutes). Active cool down occurred between 600-720 seconds (2 minutes). Passive  
274 recovery following HIIE occurred between 720 – 1020 seconds (5 minutes).

275

### 276 Sex Differences in MCAv Response to HIIE

277 The MCAv response to HIIE differed between men and women, shown in **Table 4**. Although  
278 resting BL MCAv was significantly higher in women compared to men ( $p = 0.01$ ), the percent  
279 change in MCAv was greater in men, shown in **Figure 4**. Therefore, during intervals 4 through  
280 10, MCAv was no longer significantly different between men and women. However, following  
281 HIIE and 30-minutes after HIIE, MCAv returned to being higher in women compared to men ( $p$   
282 = 0.01). In women, the change in MCAv was related to the change in  $P_{ET}CO_2$  between intervals 4



283 and 5 ( $r = 0.81$ ,  $p = 0.03$ ), intervals 6 and 7 ( $r = 0.90$ ,  $p = 0.01$ ), intervals 7 and 8 ( $r = 0.87$ ,  $p =$   
 284  $0.01$ ), and intervals 9 and 10 ( $r = 0.87$ ,  $p = 0.01$ ). In men, the change in MCAv was related to the  
 285 change in  $P_{ET}CO_2$  between intervals 6 and 7 ( $r = 0.75$ ,  $p = 0.05$ ) and intervals 7 and 8 ( $r = 0.98$ ,  $p$   
 286  $< 0.001$ ).

287

288 **Table 4. Absolute MCAv Response Between Sex**

|                                                             | <b>Women</b><br>(n=7) | <b>Men</b><br>(n=7) | <b>p-value</b> |
|-------------------------------------------------------------|-----------------------|---------------------|----------------|
| <b>BL MCAv (cm·s<sup>-1</sup>)</b>                          | 70.9 ± 8.1            | 59.3 ± 5.8          | <b>0.01</b>    |
| <b>Interval 1: Low Intensity MCAv (cm·s<sup>-1</sup>)</b>   | 75.4 ± 11.3           | 61.7 ± 7.1          | <b>0.02</b>    |
| <b>Interval 2: High Intensity MCAv (cm·s<sup>-1</sup>)</b>  | 80.8 ± 12.3           | 71.4 ± 7.9          | 0.11           |
| <b>Interval 3: Low Intensity MCAv (cm·s<sup>-1</sup>)</b>   | 91.4 ± 12.3           | 77.8 ± 9.3          | <b>0.04</b>    |
| <b>Interval 4: High Intensity MCAv (cm·s<sup>-1</sup>)</b>  | 83.6 ± 11.6           | 78.7 ± 10.2         | 0.42           |
| <b>Interval 5: Low Intensity MCAv (cm·s<sup>-1</sup>)</b>   | 85.9 ± 11.8           | 80.8 ± 11.5         | 0.42           |
| <b>Interval 6: High Intensity MCAv (cm·s<sup>-1</sup>)</b>  | 80.1 ± 11.2           | 77.3 ± 10.3         | 0.63           |
| <b>Interval 7: Low Intensity MCAv (cm·s<sup>-1</sup>)</b>   | 85.3 ± 11.1           | 77.8 ± 11.3         | 0.24           |
| <b>Interval 8: High Intensity MCAv (cm·s<sup>-1</sup>)</b>  | 80.2 ± 10.5           | 73.0 ± 9.6          | 0.20           |
| <b>Interval 9: Low Intensity MCAv (cm·s<sup>-1</sup>)</b>   | 84.0 ± 10.2           | 75.1 ± 11.2         | 0.14           |
| <b>Interval 10: High Intensity MCAv (cm·s<sup>-1</sup>)</b> | 79.2 ± 9.5            | 70.8 ± 8.7          | 0.11           |
| <b>Active Cool Down Minute 1 MCAv (cm·s<sup>-1</sup>)</b>   | 85.2 ± 9.4            | 76.5 ± 10.6         | 0.13           |
| <b>Active Cool Down Minute 2 MCAv (cm·s<sup>-1</sup>)</b>   | 75.1 ± 7.5            | 66.5 ± 9.4          | 0.08           |
| <b>Following HIIE MCAv (cm·s<sup>-1</sup>)</b>              | 69.4 ± 7.4            | 57.0 ± 8.1          | <b>0.01</b>    |
| <b>30-minutes after HIIE MCAv (cm·s<sup>-1</sup>)</b>       | 72.5 ± 8.9            | 59.7 ± 7.5          | <b>0.01</b>    |

Mean  $\pm$  Standard Deviations. MCAv = Middle Cerebral Artery Blood Velocity

289

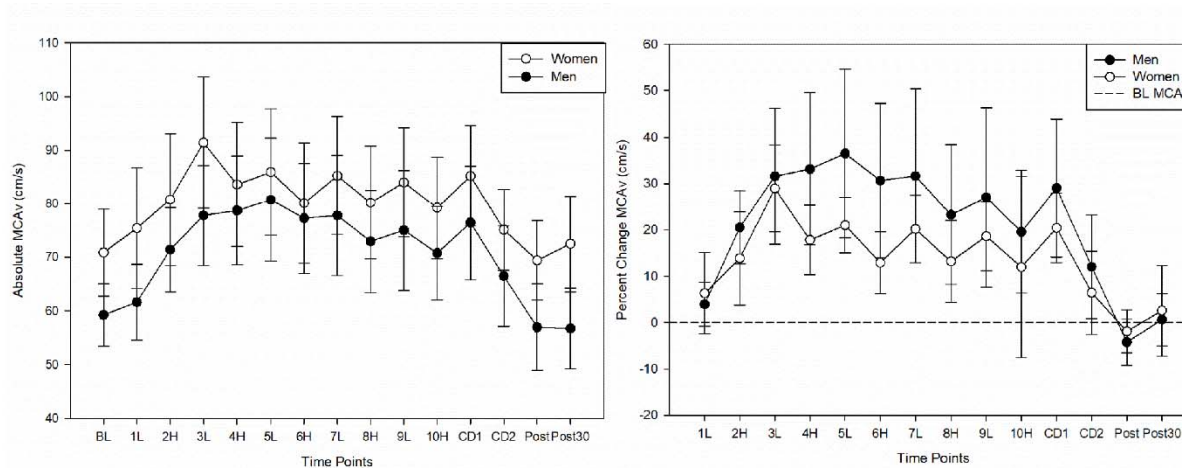

290

291 **Figure 4** – Absolute MCAv response to high intensity interval exercise (left) compared to the  
292 relative percent change MCAv response (left). Horizontal dashed line represents baseline value.

293

## 294 Discussion

295 Short interval HIIE is widely utilized to improve peripheral vascular health(35, 36) despite  
296 minimal research into its effects on the cerebrovascular system.(10) This study provides novel  
297 and crucial insight into the MCAv response to rapid and repetitive short interval HIIE in healthy  
298 young adults. The primary findings of the study are: 1) MCAv did not decrease below resting  
299 values during HIIE, 2) MCAv peaked within 3 minutes of HIIE and began to decrease with high  
300 intensity, 3) MCAv rebounded during the low intensity intervals, 4) MCAv decreased below  
301 resting values for 5 minutes after HIIE, and 5) resting MCAv was higher in women compared to  
302 men, but men had a greater change in MCAv during HIIE.

303

304 The primary objective of this study was to characterize the MCAv response during an acute bout  
305 of 1-minute interval HIIE in healthy adults. Based on previously published work,(11) we  
306 hypothesized that MCAv would decrease below BL MCAv during an acute 10-minute HIIE  
307 bout. However, our primary hypothesis was not supported by our findings. While MCAv did not  
308 decrease below resting MCAv throughout the HIIE bout, MCAv did start to decrease after 3  
309 minutes of HIIE. Initially, MCAv increased with the onset of HIIE and was moderately  
310 correlated with the change in MAP. However, MCAv began to decrease after 3 minutes of HIIE  
311 and was moderately correlated with the change in  $P_{ET}CO_2$ . Therefore, the initial rise in MCAv  
312 could be partially explained by peripheral blood pressure while the latter decrease in MCAv was  
313 driven by hyperventilation induced arteriole vasoconstriction.

314

315 Prior research has demonstrated a decrease in MCAv below BL resting MCAv during 1-minute  
316 interval HIIE in young children.(11) In contrast, we did not find a reduction in MCAv below BL  
317 MCAv, which could be due to the age of the participants (children versus adults), the high  
318 intensity workload (90% versus 70% estimated watt maximum), and the exercise modality (cycle  
319 versus recumbent stepper). Our results are supported by previous research performing short  
320 sprint interval training in healthy adults that also found no reduction in MCAv below BL resting  
321 MCAv.(12) However, the prior study performed 30-second sprint intervals at 200% watt  
322 maximum with longer 4.5-minute recovery intervals. Therefore, our study contributes to the  
323 existing literature showing no reduction in MCAv below BL during an acute 10-minute bout of  
324 short interval HIIE with alternating 1-minute high intensity and low intensity intervals.

325

326 While MCAv started to decrease after 3 minutes of HIIE during the high intensity intervals,  
327 MCAv increased or “rebounded” during the low intensity intervals. Previous studies measuring  
328 MCAv during HIIE have also reported this “rebounding” effect.(11, 12, 34) MCAv  
329 “rebounding” during light intensity intervals could be partially explained by  $P_{ET}CO_2$  as they were  
330 moderately correlated. MCAv also closely followed the pattern of  $P_{ET}CO_2$ , with both measures  
331 decreasing during high intensity (hyperventilation) and increasing during recovery. We have also  
332 shown increased CVCi during the recovery intervals, showing a potential contribution of MAP to  
333 the “rebounding effect”. It has been hypothesized that the “rebounding effect” could due to the  
334 increase in CVCi, or conductance of MAP to the brain, due to an attenuation of cerebral  
335 autoregulation (ability of the brain to maintain homeostasis during blood pressure fluctuations)  
336 with an acute bout of high intensity exercise.(12, 18, 34) Others have hypothesized that increased  
337 shear stress on the cerebrovascular arterial walls with high intensity exercise could create  
338 vasodilatory effects.(12, 37) However, future research measuring dynamic cerebrovascular  
339 autoregulation and the cerebrovascular flow mediated dilatory response to short interval HIIE  
340 requires further exploration.

341  
342 Our secondary hypotheses were that MCAv would be lower than BL MCAv during passive  
343 recovery 1) following HIIE and 2) 30-minutes after HIIE. Our hypotheses were partially  
344 supported by our findings. MCAv was lower during the 5-minute rest following HIIE but not at  
345 30-minutes after HIIE. Our findings are supported by previous research also reporting a  
346 reduction in MCAv below BL following HIIE.(11) The reduction in MCAv following exercise  
347 may be a unique characteristic to HIIE, as a previous study performing 20 minutes of moderate  
348 intensity continuous exercise reported no reduction in MCAv after exercise in healthy adults.(38)

349 The reduction in MCAv cannot be fully explained by  $P_{ET}CO_2$  considering MCAv recovers to BL  
350 resting values at 30-minutes after HIIE while  $P_{ET}CO_2$  remains significantly decreased.(11) This  
351 could be due to an attenuation of cerebrovascular reactivity to carbon dioxide following an acute  
352 bout of HIIE.(10, 39)

353

#### 354 *CVCi Response*

355 We are the first to characterize the dynamic CVCi response during HIIE. We report a quick  
356 increase in conductance during the first high intensity interval with a subsequently longer time  
357 for the remaining high intensity intervals. Similar to Labrecque et al. examining the time to peak  
358 MCAv during a 30-second high intensity sprint,(34) we characterized the time to peak (or nadir)  
359 CVCi during each 1-minute high intensity and low intensity intervals. We found that the time to  
360 peak CVCi was fastest during the first high intensity interval compared to the remaining high  
361 intensity intervals. We hypothesize that the longer time to peak/nadir CVCi during high intensity  
362 intervals could be a regulatory response attenuating quick fluctuations in CVCi with increased  
363 MAP. The slope of the CVCi response was negative during the latter high intensity intervals, due  
364 to hyperventilation induced decreases in MCAv. However, CVCi increased or “rebounded”  
365 during the low intensity intervals. While prior work has shown a decreased regulatory response  
366 following HIIE,(18) further research is needed to determine whether the increase in CVCi or  
367 “rebounding effect” is due to an attenuation of the regulatory response during HIIE.

368

#### 369 *Sex Differences*

370 Our previous work identified women as having a higher BL resting MCAv compared to men but  
371 no significant difference in the MCAv response to moderate intensity continuous exercise.(14,

372 15) While previous work has been published on the MCAv response to interval exercise, to our  
373 knowledge, no one has studied sex differences during short interval HIIE and recovery.(12, 13)  
374 Although women had a higher BL MCAv at rest, MCAv was not significantly different during  
375 exercise due to a larger MCAv response in men. As observed in **Table 1**, the men worked at a  
376 significantly greater absolute workload than women, which we propose influenced the greater  
377 MCAv response. The MCAv differences between sex could also be due to young men having a  
378 higher resting pulsatility index, as lower MCAv has been hypothesized to be a protective  
379 mechanism for the downstream microvasculature.(14, 40) Another potential explanation for the  
380 lack of significance during HIIE could be due to women having a greater reactivity to carbon  
381 dioxide causing decreases in MCAv, which is supported by strong correlations between the  
382 change in MCAv and change in  $P_{ET}CO_2$  in women compared to men.(41) Although we  
383 standardized the visits to be within days 1-7 of the follicular phase, we did not directly measure  
384 the effects of hormones on MCAv in both women and men in this study.

385

#### 386 *Limitations*

387 There are limitations for the current study. First, the middle cerebral artery (MCA) diameter  
388 could not be directly measured. There is controversy whether MCA diameter is vasoactive with  
389 high intensity exercise induced hyperventilation.(42, 43) One study states that MCAv may  
390 underestimate changes in cerebral blood flow during changes in  $P_{ET}CO_2$ .(44) while another  
391 study reports no change in MCA diameter measured through magnetic resonance imaging with a  
392  $P_{ET}CO_2$  change of 7.5mm Hg during hyperventilation.(42) However, due to the difficulty of  
393 temporally assessing MCA diameter during high intensity exercise, we assumed the MCA  
394 diameter remains constant. Second, HIIE was dosed based on an estimated maximal intensity

395 rather than directly measuring the anaerobic threshold. However, based on the  $P_{ET}CO_2$  response,  
396 we believe the HIIE was accurately prescribed. Third, three individuals were also outside the  
397 window of 2-14 days between study visits. However, these individuals confirmed no changes to  
398 their health or physical activity routine between study visits 1 and 2. Therefore, in the context of  
399 this study design in healthy adults, the results were not likely skewed. Lastly,  $P_{ET}CO_2$  was  
400 measured via nasal cannula, and breathing strictly through the nose during HIIE could become  
401 increasingly difficult. However, a study team member monitored nasal breathing throughout the  
402 entirety of the MCAv recordings and acute HIIE bout to ensure adherence to the protocol and  
403 appropriate  $P_{ET}CO_2$  values.

404

#### 405 *Future Considerations*

406 Prior literature reviews suggest HIIE results in rapid changes (oscillations) in blood pressure that  
407 could challenge the cerebrovascular system, particularly those with cerebrovascular  
408 impairment.(45) Despite these proposed considerations, high intensity gait training and interval  
409 exercise are recommended to improve walking for those with neurological disease.(46) Further,  
410 clinical practice guidelines are beginning to include HIIE with short intervals of 30-seconds or 1-  
411 minute to improve walking outcomes after stroke.(28, 46, 47) The logical next step in this line of  
412 research will be to focus on clinical population such as stroke.

413

#### 414 **Conclusion**

415 During an acute 10-minute bout of HIIE with short intervals, MCAv does not decrease below BL  
416 resting MCAv in healthy young adults. However, MCAv falls below BL resting MCAv  
417 following HIIE but returns to BL at 30-minutes after HIIE. Further exploration into the

418 regulatory response and physiological mechanisms contributing to a reduction in MCAv during  
419 passive recovery after HIIE is needed. This study contributes novel characterizations of the  
420 MCAv response to short interval HIIE in healthy adult controls, including changes in CVCi and  
421 sex differences. We have laid the foundation for studying the cerebrovascular response to short  
422 interval HIIE.(46)

423

#### 424 **Funding and Acknowledgements**

425 We would like to thank Katherine Nguyen and Jake Buchanan for their contributions to data  
426 collection. AW was supported by the Eunice Kennedy Shriver National Institute of Child Health  
427 & Human Development of the National Institutes of Health (T32HD057850). The content is  
428 solely the responsibility of the authors and does not necessarily represent the official views of the  
429 National Institutes of Health. REDCap at University of Kansas Medical Center is supported by  
430 Clinical and Translational Science Awards (CTSA) Award # ULTR000001 from National Center  
431 for Research Resources (NCRR). The Georgia Holland Research in Exercise and Cardiovascular  
432 Health (REACH) laboratory space was supported by the Georgia Holland Endowment Fund.

433

#### 434 **Conflicts of Interest**

435 The author(s) report no conflict of interest. The results of this study have been presented clearly,  
436 honestly, and without fabrication, falsification, or inappropriate data manipulation.



437 **References**

- 438 1. Smith KJ, Ainslie PN. Regulation of cerebral blood flow and metabolism during exercise. *Exp*  
439 *Physiol.* 2017;102(11):1356-71. Epub 2017/08/09. doi: 10.1113/EP086249. PubMed PMID: 28786150.
- 440 2. Witte E, Liu Y, Ward JL, Kempf KS, Whitaker A, Vidoni ED, et al. Exercise intensity and middle  
441 cerebral artery dynamics in humans. *Respir Physiol Neurobiol.* 2019;262:32-9. Epub 2019/02/03. doi:  
442 10.1016/j.resp.2019.01.013. PubMed PMID: 30710650; PubMed Central PMCID: PMC6393201.
- 443 3. Thomas SN, Schroeder T, Secher NH, Mitchell JH. Cerebral blood flow during submaximal and  
444 maximal dynamic exercise in humans. *J Appl Physiol (1985).* 1989;67(2):744-8. Epub 1989/08/01. doi:  
445 10.1152/jappl.1989.67.2.744. PubMed PMID: 2507500.
- 446 4. Hellstrom G, Wahlgren NG. Physical exercise increases middle cerebral artery blood flow  
447 velocity. *Neurosurg Rev.* 1993;16(2):151-6. Epub 1993/01/01. doi: 10.1007/BF00258249. PubMed PMID:  
448 8345909.
- 449 5. Billinger SA, Craig JC, Kwapiszeski SJ, Sisante JV, Vidoni ED, Maletsky R, et al. Dynamics of middle  
450 cerebral artery blood flow velocity during moderate-intensity exercise. *J Appl Physiol (1985).*  
451 2017;122(5):1125-33. Epub 2017/03/11. doi: 10.1152/japplphysiol.00995.2016. PubMed PMID:  
452 28280106; PubMed Central PMCID: PMC65451537.
- 453 6. Olson TP TJ, Dengel DR. Relationship between ventilatory threshold and cerebral blood flow  
454 during maximal exercise in humans. *Open Sports Med J.* 2009;3(9):13. doi:  
455 10.2174/1874387000903010009.
- 456 7. Jorgensen LG, Perko G, Secher NH. Regional cerebral artery mean flow velocity and blood flow  
457 during dynamic exercise in humans. *J Appl Physiol (1985).* 1992;73(5):1825-30. Epub 1992/11/01. doi:  
458 10.1152/jappl.1992.73.5.1825. PubMed PMID: 1474058.
- 459 8. Fitts RH. Cellular mechanisms of muscle fatigue. *Physiol Rev.* 1994;74(1):49-94. Epub  
460 1994/01/01. doi: 10.1152/physrev.1994.74.1.49. PubMed PMID: 8295935.
- 461 9. Ainslie PN, Duffin J. Integration of cerebrovascular CO<sub>2</sub> reactivity and chemoreflex control of  
462 breathing: mechanisms of regulation, measurement, and interpretation. *Am J Physiol Regul Integr Comp*  
463 *Physiol.* 2009;296(5):R1473-95. Epub 2009/02/13. doi: 10.1152/ajpregu.91008.2008. PubMed PMID:  
464 19211719.
- 465 10. Whitaker AA, Alwatban M, Freemyer A, Perales-Puchalt J, Billinger SA. Effects of high intensity  
466 interval exercise on cerebrovascular function: A systematic review. *PLoS One.* 2020;15(10):e0241248.  
467 Epub 2020/10/30. doi: 10.1371/journal.pone.0241248. PubMed PMID: 33119691.
- 468 11. Tallon CM, Simair RG, Koziol AV, Ainslie PN, McManus AM. Intracranial Vascular Responses to  
469 High-Intensity Interval Exercise and Moderate-Intensity Steady-State Exercise in Children. *Pediatr Exerc*  
470 *Sci.* 2019;31(3):290-5. Epub 2019/03/06. doi: 10.1123/pes.2018-0234. PubMed PMID: 30832540.
- 471 12. Weaver SR, Skinner BD, Furlong R, Lucas RAI, Cable NT, Rendeiro C, et al. Cerebral Hemodynamic  
472 and Neurotrophic Factor Responses Are Dependent on the Type of Exercise. *Front Physiol.*  
473 2020;11:609935. Epub 2021/02/09. doi: 10.3389/fphys.2020.609935. PubMed PMID: 33551835;  
474 PubMed Central PMCID: PMC67859714.
- 475 13. Klein T, Bailey TG, Abeln V, Schneider S, Askew CD. Cerebral Blood Flow during Interval and  
476 Continuous Exercise in Young and Old Men. *Med Sci Sports Exerc.* 2019;51(7):1523-31. Epub  
477 2019/02/16. doi: 10.1249/MSS.0000000000001924. PubMed PMID: 30768552.
- 478 14. Alwatban MR, Aaron SE, Kaufman CS, Barnes JN, Brassard P, Ward JL, et al. Effects of Age and  
479 Sex on Middle Cerebral Artery Blood Velocity and Flow Pulsatility Index Across the Adult Lifespan. *J Appl*  
480 *Physiol (1985).* 2021. Epub 2021/03/12. doi: 10.1152/japplphysiol.00926.2020. PubMed PMID:  
481 33703940.
- 482 15. Ward JL, Craig JC, Liu Y, Vidoni ED, Maletsky R, Poole DC, et al. Effect of healthy aging and sex on  
483 middle cerebral artery blood velocity dynamics during moderate-intensity exercise. *Am J Physiol Heart*

- 484 Circ Physiol. 2018;315(3):H492-H501. Epub 2018/05/19. doi: 10.1152/ajpheart.00129.2018. PubMed  
485 PMID: 29775407; PubMed Central PMCID: PMC6172645.
- 486 16. Thompson PD, Arena R, Riebe D, Pescatello LS, American College of Sports M. ACSM's new  
487 preparticipation health screening recommendations from ACSM's guidelines for exercise testing and  
488 prescription, ninth edition. *Curr Sports Med Rep*. 2013;12(4):215-7. Epub 2013/07/16. doi:  
489 10.1249/JSR.0b013e31829a68cf. PubMed PMID: 23851406.
- 490 17. Perod AL, Roberts AE, McKinney WM. Caffeine can affect velocity in the middle cerebral artery  
491 during hyperventilation, hypoventilation, and thinking: a transcranial Doppler study. *J Neuroimaging*.  
492 2000;10(1):33-8. Epub 2000/02/10. doi: 10.1111/jon200010133. PubMed PMID: 10666980.
- 493 18. Burma JS, Copeland P, Macaulay A, Khatra O, Wright AD, Smirl JD. Dynamic cerebral  
494 autoregulation across the cardiac cycle during 8 hr of recovery from acute exercise. *Physiol Rep*.  
495 2020;8(5):e14367. Epub 2020/03/13. doi: 10.14814/phy2.14367. PubMed PMID: 32163235; PubMed  
496 Central PMCID: PMC67066871.
- 497 19. Mathew RJ, Wilson WH. Regional cerebral blood flow changes associated with ethanol  
498 intoxication. *Stroke*. 1986;17(6):1156-9. Epub 1986/11/01. doi: 10.1161/01.str.17.6.1156. PubMed  
499 PMID: 3810714.
- 500 20. Krejza J, Mariak Z, Huba M, Wolczynski S, Lewko J. Effect of endogenous estrogen on blood flow  
501 through carotid arteries. *Stroke*. 2001;32(1):30-6. Epub 2001/01/04. doi: 10.1161/01.str.32.1.30.  
502 PubMed PMID: 11136910.
- 503 21. Conroy DA, Spielman AJ, Scott RQ. Daily rhythm of cerebral blood flow velocity. *J Circadian*  
504 *Rhythms*. 2005;3(1):3. Epub 2005/03/12. doi: 10.1186/1740-3391-3-3. PubMed PMID: 15760472;  
505 PubMed Central PMCID: PMC555580.
- 506 22. Grant EG, Benson CB, Moneta GL, Alexandrov AV, Baker JD, Bluth EI, et al. Carotid artery  
507 stenosis: gray-scale and Doppler US diagnosis--Society of Radiologists in Ultrasound Consensus  
508 Conference. *Radiology*. 2003;229(2):340-6. Epub 2003/09/23. doi: 10.1148/radiol.2292030516. PubMed  
509 PMID: 14500855.
- 510 23. Whitfield GP, Pettee Gabriel KK, Rahbar MH, Kohl HW, 3rd. Application of the American Heart  
511 Association/American College of Sports Medicine Adult Preparticipation Screening Checklist to a  
512 nationally representative sample of US adults aged  $\geq 40$  years from the National Health and Nutrition  
513 Examination Survey 2001 to 2004. *Circulation*. 2014;129(10):1113-20. Epub 2014/01/15. doi:  
514 10.1161/CIRCULATIONAHA.113.004160. PubMed PMID: 24421370; PubMed Central PMCID:  
515 PMC4094111.
- 516 24. Alexandrov AV, Sloan MA, Wong LK, Douville C, Razumovsky AY, Koroshetz WJ, et al. Practice  
517 standards for transcranial Doppler ultrasound: part I--test performance. *J Neuroimaging*. 2007;17(1):11-  
518 8. Epub 2007/01/24. doi: 10.1111/j.1552-6569.2006.00088.x. PubMed PMID: 17238867.
- 519 25. Billinger SA, E VANS, McClain M, Lentz AA, Good MB. Recumbent stepper submaximal exercise  
520 test to predict peak oxygen uptake. *Med Sci Sports Exerc*. 2012;44(8):1539-44. Epub 2012/03/03. doi:  
521 10.1249/MSS.0b013e31824f5be4. PubMed PMID: 22382170; PubMed Central PMCID:  
522 PMC3388171.
- 523 26. Wilson DR, Mattlage AE, Seier NM, Todd JD, Price BG, Kwapiszeski SJ, et al. Recumbent Stepper  
524 Submaximal Test response is reliable in adults with and without stroke. *PLoS One*. 2017;12(2):e0172294.  
525 Epub 2017/02/17. doi: 10.1371/journal.pone.0172294. PubMed PMID: 28207854; PubMed Central  
526 PMCID: PMC5312932.
- 527 27. YMCA. Y's Way to Physical Fitness 3rd Edition ed1989.
- 528 28. Boyne P, Dunning K, Carl D, Gerson M, Khoury J, Rockwell B, et al. High-Intensity Interval  
529 Training and Moderate-Intensity Continuous Training in Ambulatory Chronic Stroke: Feasibility Study.  
530 *Phys Ther*. 2016;96(10):1533-44. Epub 2016/04/23. doi: 10.2522/ptj.20150277. PubMed PMID:  
531 27103222; PubMed Central PMCID: PMC5046191.

- 532 29. Currie KD, Dubberley JB, McKelvie RS, MacDonald MJ. Low-volume, high-intensity interval  
533 training in patients with CAD. *Med Sci Sports Exerc.* 2013;45(8):1436-42. Epub 2013/03/09. doi:  
534 10.1249/MSS.0b013e31828bbbd4. PubMed PMID: 23470301.
- 535 30. Nepveu JF, Thiel A, Tang A, Fung J, Lundbye-Jensen J, Boyd LA, et al. A Single Bout of High-  
536 Intensity Interval Training Improves Motor Skill Retention in Individuals With Stroke. *Neurorehabil  
537 Neural Repair.* 2017;31(8):726-35. Epub 2017/07/12. doi: 10.1177/1545968317718269. PubMed PMID:  
538 28691645.
- 539 31. Crozier J, Roig M, Eng JJ, MacKay-Lyons M, Fung J, Ploughman M, et al. High-Intensity Interval  
540 Training After Stroke: An Opportunity to Promote Functional Recovery, Cardiovascular Health, and  
541 Neuroplasticity. *Neurorehabil Neural Repair.* 2018;32(6-7):543-56. Epub 2018/04/21. doi:  
542 10.1177/1545968318766663. PubMed PMID: 29676956.
- 543 32. Boyne P MC, Carl D, Wilkerson J, Dunning K. Feasibility, Intensity and Safety of Recumbent  
544 Stepper High-intensity Interval Training in Chronic Stroke. *Arch Phys Med Rehabil.* 2015;96(12).
- 545 33. Perry BG, Cotter JD, Mejuto G, Mundel T, Lucas SJ. Cerebral hemodynamics during graded  
546 Valsalva maneuvers. *Front Physiol.* 2014;5:349. Epub 2014/10/14. doi: 10.3389/fphys.2014.00349.  
547 PubMed PMID: 25309449; PubMed Central PMCID: PMC4163977.
- 548 34. Labrecque L, Drapeau A, Rahimaly K, Imhoff S, Billaut F, Brassard P. Comparable blood velocity  
549 changes in middle and posterior cerebral arteries during and following acute high-intensity exercise in  
550 young fit women. *Physiol Rep.* 2020;8(9):e14430. Epub 2020/04/29. doi: 10.14814/phy2.14430. PubMed  
551 PMID: 32342622; PubMed Central PMCID: PMC7186567.
- 552 35. Weston KS, Wisloff U, Coombes JS. High-intensity interval training in patients with lifestyle-  
553 induced cardiometabolic disease: a systematic review and meta-analysis. *Br J Sports Med.*  
554 2014;48(16):1227-34. Epub 2013/10/23. doi: 10.1136/bjsports-2013-092576. PubMed PMID: 24144531.
- 555 36. Ramirez-Velez R, Hernandez-Quinones PA, Tordecilla-Sanders A, Alvarez C, Ramirez-Campillo R,  
556 Izquierdo M, et al. Effectiveness of HIIT compared to moderate continuous training in improving vascular  
557 parameters in inactive adults. *Lipids Health Dis.* 2019;18(1):42. Epub 2019/02/06. doi: 10.1186/s12944-  
558 019-0981-z. PubMed PMID: 30717757; PubMed Central PMCID: PMC6362599.
- 559 37. Carr J, Hoiland RL, Caldwell HG, Coombs GB, Howe CA, Tremblay JC, et al. Internal carotid and  
560 brachial artery shear-dependent vasodilator function in young healthy humans. *J Physiol.*  
561 2020;598(23):5333-50. Epub 2020/09/10. doi: 10.1113/JP280369. PubMed PMID: 32901919.
- 562 38. Robertson AD, Atwi S, Kostoglou K, Verhoeff N, Oh PI, Mitsis GD, et al. Cerebrovascular  
563 Pulsatility During Rest and Exercise Reflects Hemodynamic Impairment in Stroke and Cerebral Small  
564 Vessel Disease. *Ultrasound Med Biol.* 2019;45(12):3116-27. Epub 2019/10/02. doi:  
565 10.1016/j.ultrasmedbio.2019.08.019. PubMed PMID: 31570171.
- 566 39. Burma JS, Macaulay A, Copeland P, Khatra O, Bouliane KJ, Smirl JD. Comparison of  
567 cerebrovascular reactivity recovery following high-intensity interval training and moderate-intensity  
568 continuous training. *Physiol Rep.* 2020;8(11):e14467. Epub 2020/06/09. doi: 10.14814/phy2.14467.  
569 PubMed PMID: 32506845; PubMed Central PMCID: PMC7276190.
- 570 40. Alwatban MR, Liu Y, Perdomo SJ, Ward JL, Vidoni ED, Burns JM, et al. TCD Cerebral  
571 Hemodynamic Changes during Moderate-Intensity Exercise in Older Adults. *J Neuroimaging.*  
572 2020;30(1):76-81. Epub 2019/11/22. doi: 10.1111/jon.12675. PubMed PMID: 31750593; PubMed  
573 Central PMCID: PMC6954976.
- 574 41. Kastrup A, Thomas C, Hartmann C, Schabet M. Sex dependency of cerebrovascular CO2  
575 reactivity in normal subjects. *Stroke.* 1997;28(12):2353-6. Epub 1997/12/31. doi:  
576 10.1161/01.str.28.12.2353. PubMed PMID: 9412613.
- 577 42. Valdeza JM, Balzer JO, Villringer A, Vogl TJ, Kutter R, Einhaupl KM. Changes in blood flow  
578 velocity and diameter of the middle cerebral artery during hyperventilation: assessment with MR and

- 579 transcranial Doppler sonography. *AJNR Am J Neuroradiol.* 1997;18(10):1929-34. Epub 1997/12/24.  
580 PubMed PMID: 9403456.
- 581 43. Hoiland RL, Ainslie PN. CrossTalk proposal: The middle cerebral artery diameter does change  
582 during alterations in arterial blood gases and blood pressure. *J Physiol.* 2016;594(15):4073-5. Epub  
583 2016/03/25. doi: 10.1113/JP271981. PubMed PMID: 27010010; PubMed Central PMCID:  
584 PMCPMC4806217.
- 585 44. Coverdale NS, Gati JS, Opalevych O, Perrotta A, Shoemaker JK. Cerebral blood flow velocity  
586 underestimates cerebral blood flow during modest hypercapnia and hypocapnia. *J Appl Physiol (1985).*  
587 2014;117(10):1090-6. Epub 2014/07/12. doi: 10.1152/jappphysiol.00285.2014. PubMed PMID:  
588 25012027.
- 589 45. Lucas SJE, Cotter JD, Brassard P, Bailey DM. High-intensity interval exercise and cerebrovascular  
590 health: curiosity, cause, and consequence. *J Cerebr Blood F Met.* 2015;35(6):902-11. doi:  
591 10.1038/jcbfm.2015.49. PubMed PMID: WOS:000355575600003.
- 592 46. Hornby TG, Reisman DS, Ward IG, Scheets PL, Miller A, Haddad D, et al. Clinical Practice  
593 Guideline to Improve Locomotor Function Following Chronic Stroke, Incomplete Spinal Cord Injury, and  
594 Brain Injury. *J Neurol Phys Ther.* 2020;44(1):49-100. Epub 2019/12/14. doi:  
595 10.1097/NPT.0000000000000303. PubMed PMID: 31834165.
- 596 47. Boyne P, Scholl V, Doren S, Carl D, Billinger SA, Reisman DS, et al. Locomotor training intensity  
597 after stroke: Effects of interval type and mode. *Top Stroke Rehabil.* 2020;27(7):483-93. Epub  
598 2020/02/18. doi: 10.1080/10749357.2020.1728953. PubMed PMID: 32063178; PubMed Central PMCID:  
599 PMCPMC7429314.

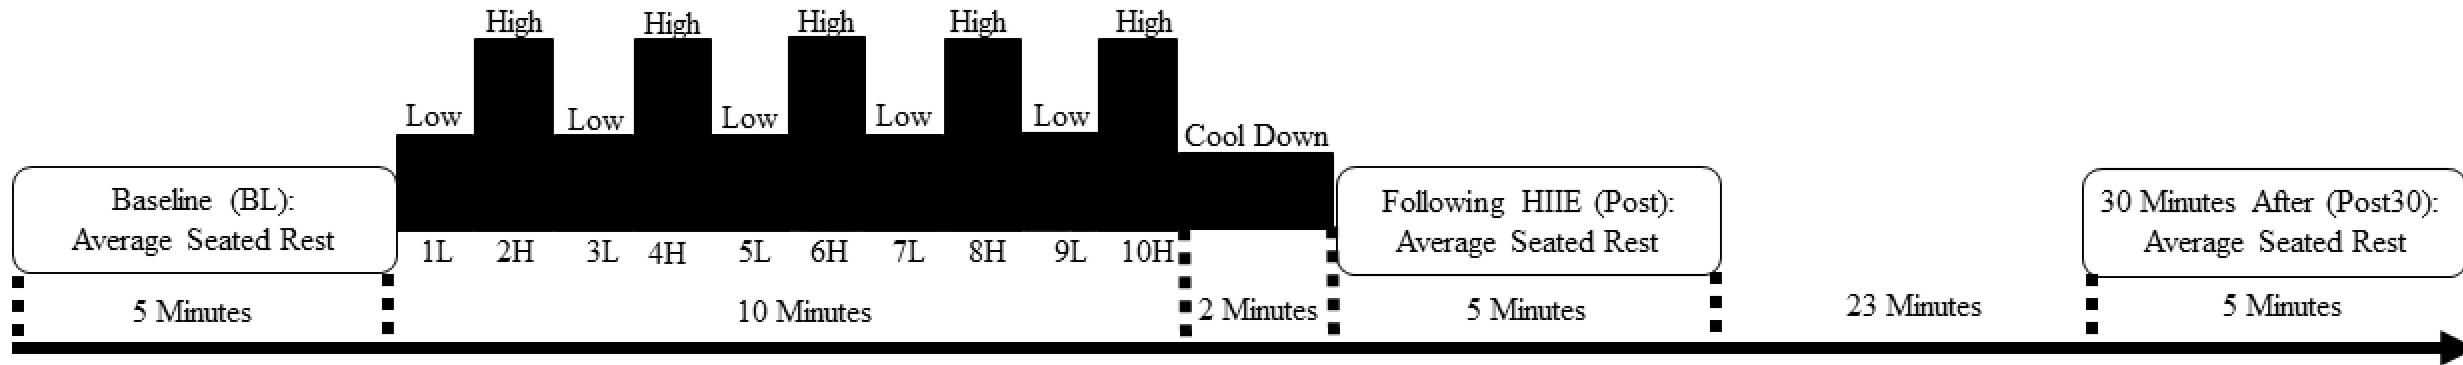

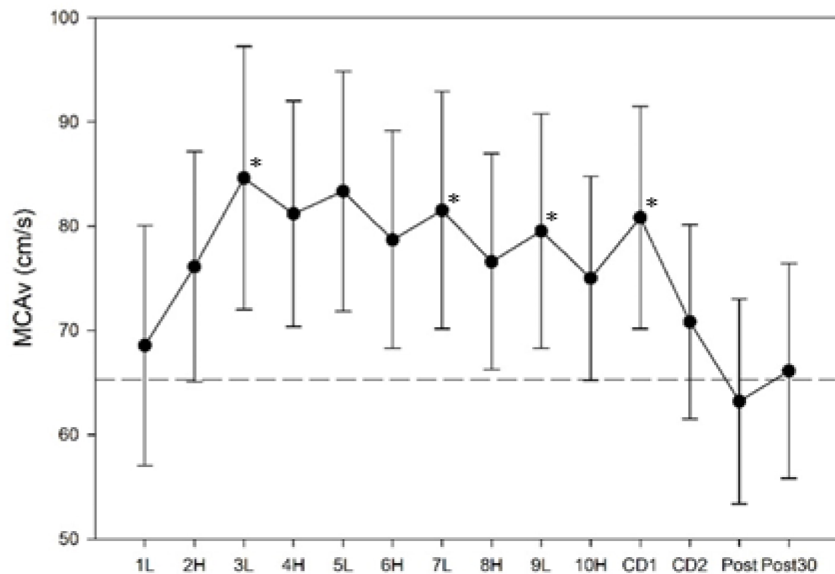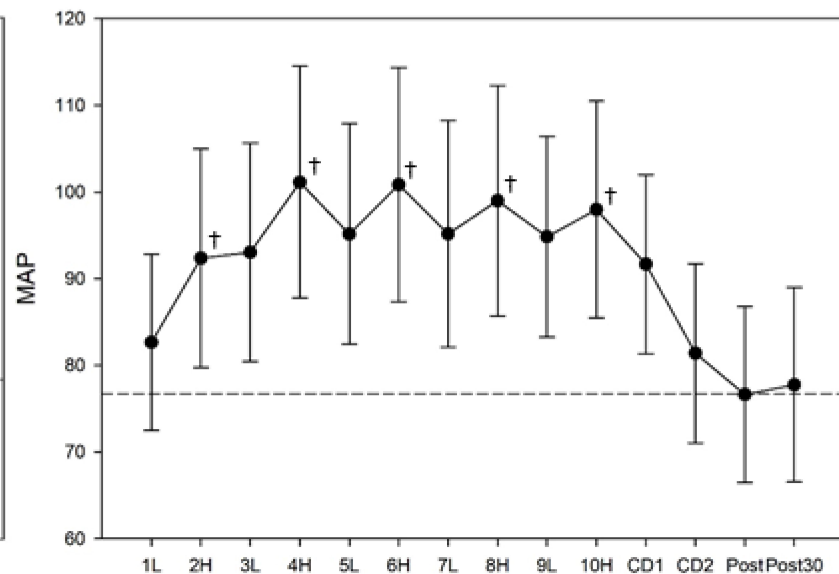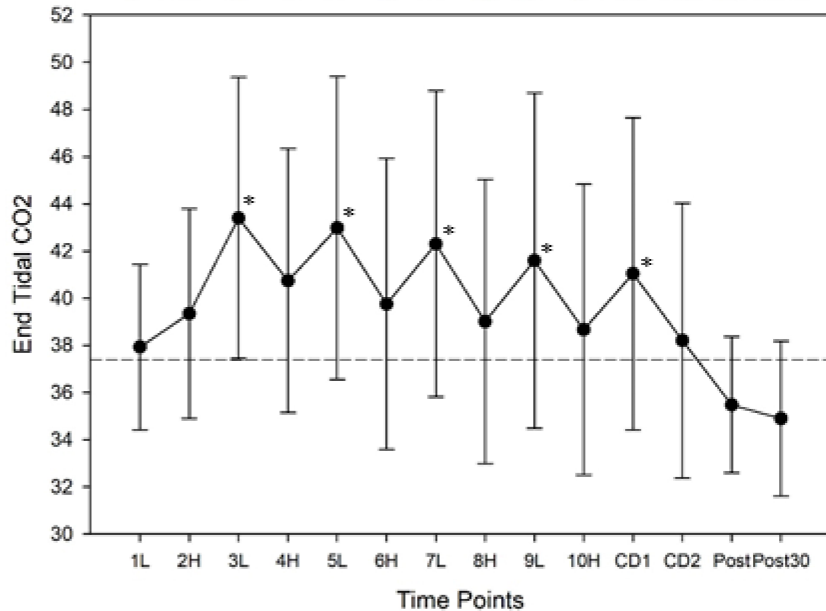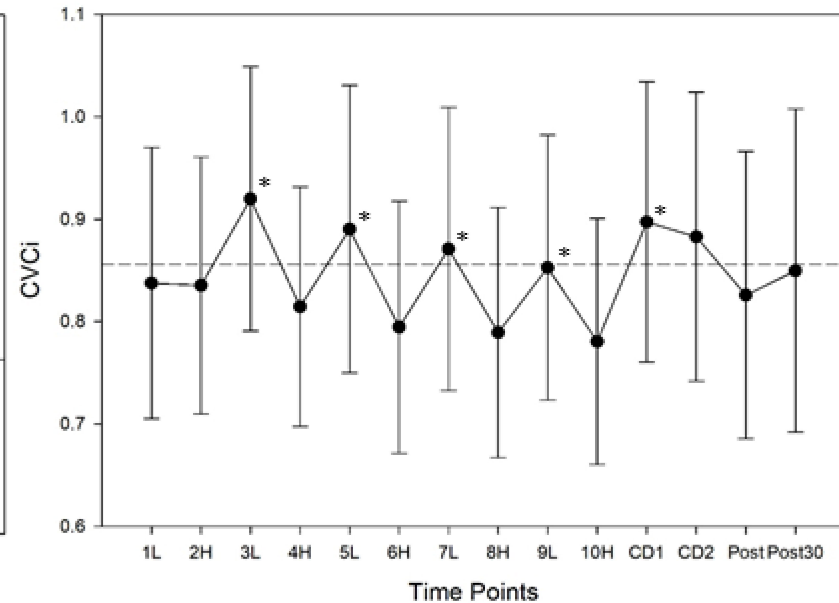

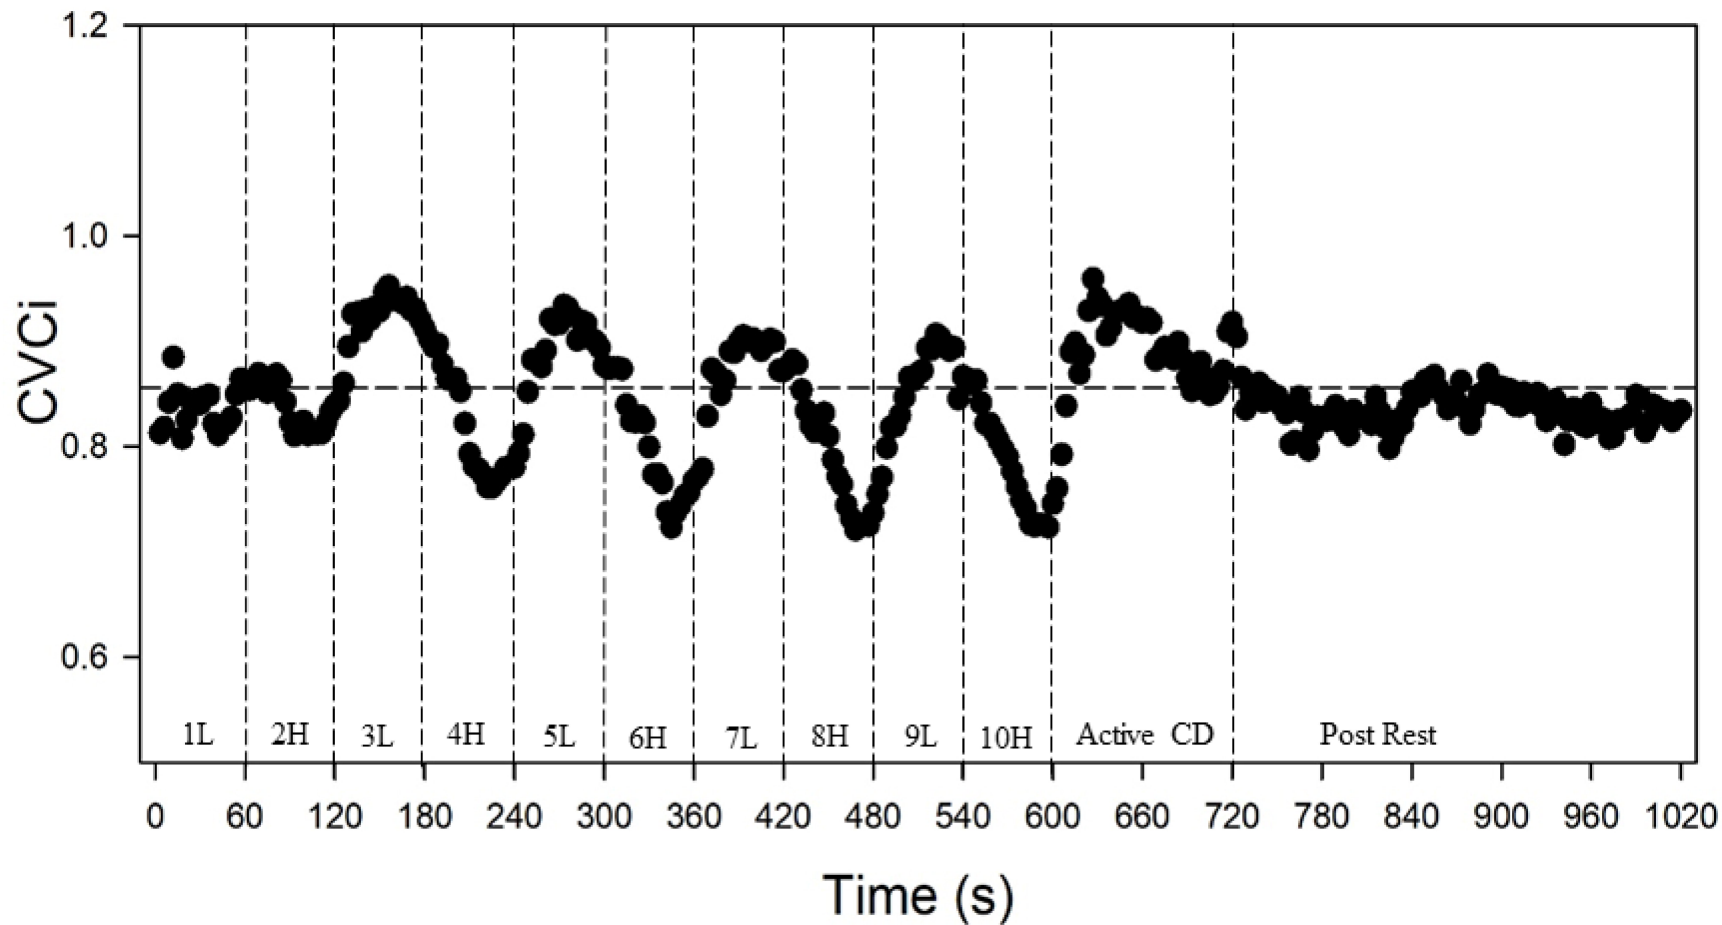

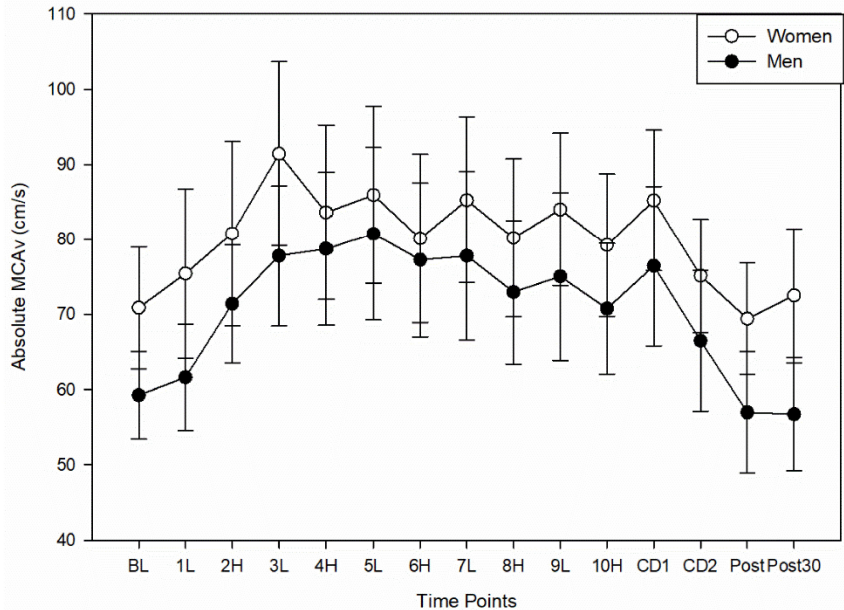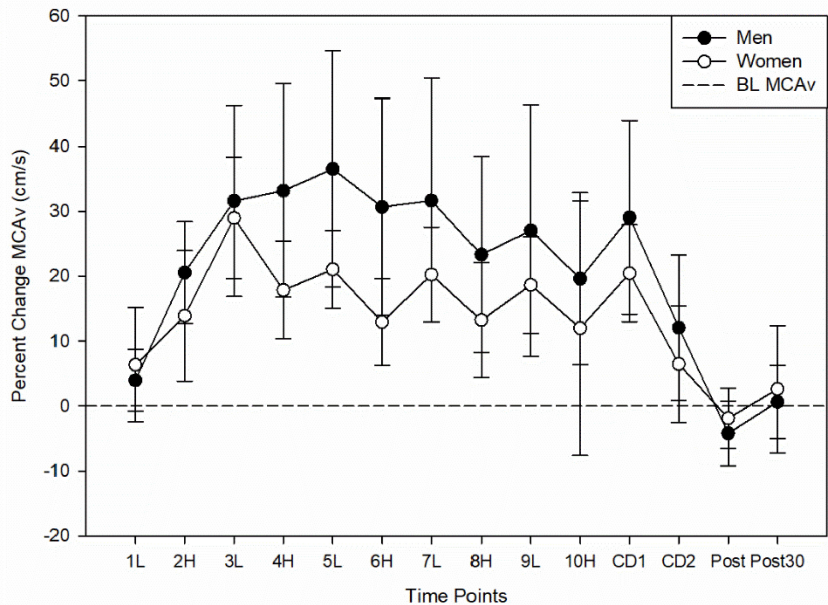

Source: https://medrxiv.org/content/10.1101/2021.05.05.21256704v1.full.pdf
